## RESEARCH ARTICLE

# Attractant and repellent cues cooperate in guiding a subset of olfactory sensory axons to a well-defined protoglomerular target

Alemji A. Taku, Christina L. Marcaccio, Wenda Ye, Gregory J. Krause and Jonathan A. Raper\*

## ABSTRACT

Olfactory sensory axons target well-defined intermediate targets in the zebrafish olfactory bulb called protoglomeruli well before they form odorant receptor-specific glomeruli. A subset of olfactory sensory neurons are labeled by expression of the *or111-7*:IRES:GAL4 transgene whose axons terminate in the central zone (CZ) protoglomerulus. Previous work has shown that some of these axons misproject to the more dorsal and anterior dorsal zone (DZ) protoglomerulus in the absence of Netrin 1/Dcc signaling. In search of additional cues that guide these axons to the CZ, we found that Semaphorin 3D (Sema3D) is expressed in the anterior bulb and acts as a repellent that pushes them towards the CZ. Further analysis indicates that Sema3D signaling is mediated through Nrp1a, while Nrp2b also promotes CZ targeting but in a Sema3D-independent manner. *nrp1a*, *nrp2b* and *dcc* transcripts are detected in *or111-7* transgene-expressing neurons early in development and both Nrp1a and Dcc act cell-autonomously in sensory neurons to promote accurate targeting to the CZ. *dcc* and *nrp1a* double mutants have significantly more DZ misprojections than either single mutant, suggesting that the two signaling systems act independently and in parallel to direct a specific subset of sensory axons to their initial protoglomerular target.

**KEY WORDS:** Axon guidance, Olfactory development, Protoglomeruli, Sema3D, Semaphorin, Zebrafish

## INTRODUCTION

The targeting of axons to their correct postsynaptic partners is a critical step in circuit formation. Studying this process is made challenging by the extraordinary degree of neuronal diversity within the nervous system and the specificity with which neuronal partners interact. The olfactory system is an attractive model for the study of axon targeting because each olfactory sensory neuron (OSN) assumes a specific identity as it chooses a single odorant receptor (OR) from a large gene repertoire and since OR choice is closely coordinated with axonal targeting (Alioto and Ngai, 2005; Zhang and Firestein, 2002). Although sensory neurons expressing a particular OR are broadly dispersed in the olfactory epithelium (OE), their axons converge upon one or a few reproducibly located OR-specific glomeruli in the olfactory bulb (OB); there, they synapse with the dendrites of second order neurons that communicate olfactory information deeper into the brain (Ramon y Cajal, 1892; Ressler et al., 1994; Vassar et al., 1994; Mombaerts et al., 1996; Sosulski et al., 2011; Miyasaka et al., 2014). The OR-specific glomerular map relates odorant experience to neuronal

activity at specific locations within the OB, providing a basis for the identification and discrimination of odorants (Bozza et al., 2002). This mapping is, in a sense, an early stage of olfactory information processing.

Our working hypothesis is that the development of the olfactory projection can be divided into at least two broad stages. In the first stage, rather than projecting directly to OR-specific glomeruli, early axons diffusely target larger intermediate regions called protoglomeruli that contain axons from neurons that express a specific subset of different ORs. In a second stage, later in development, OR-specific glomeruli segregate from these larger regions (Royal and Key, 1999; Treloar et al., 1999; Conzelmann et al., 2001; Potter et al., 2001; Li et al., 2005). In the mouse, the first olfactory sensory axons enter the bulb at ~E15, while glomeruli are only detectable postnatally (Doucette, 1989; Royal and Key, 1999; Conzelmann et al., 2001; Potter et al., 2001). Targeting of sensory axons from the OE to the bulb has been studied extensively in mice (Wang et al., 1998; Schwarting et al., 2000; Vassalli et al., 2002; Cutforth et al., 2003; Imai et al., 2006, 2009; Serizawa et al., 2006; Cho et al., 2007; Col et al., 2007; Kaneko-Goto et al., 2008; Nguyen-Ba-Charvet et al., 2008; Takeuchi et al., 2010). With few exceptions, most of this work has concentrated on glomerular formation near the time of birth or thereafter. The relative accessibility of postpartum animals and the convenience of using glomerulus formation to define target position has facilitated significant advances. Much less attention has been devoted to the initial acquisition of targets before glomeruli form. One important question yet to be addressed is the identity of the molecular cues that define the initial intermediate protoglomerular targets in the bulb and how are they recognized by sensory axons.

The zebrafish is an ideal vertebrate model system for identifying the cues that guide sensory axons as they first reach the bulb. Embryos are accessible at all embryonic stages and have a relatively simple olfactory system. More importantly, sensory axons initially target 12 protoglomerular neuropilar regions, which are discrete, identifiable and spatially reproducible (Dynes and Ngai, 1998; Li et al., 2005; Lakhina et al., 2012). OSN axons exiting the OE project dorsally and anteriorly into the telencephalon, entering the nascent OB by 24 hpf (Wilson et al., 1990; Hansen and Zeiske, 1993; Whitlock and Westerfield, 1998). By 48 hpf, three distinct projection branches can be observed that are thought to correspond to what will develop into the dorsal, central, and medial protoglomeruli (Dynes and Ngai, 1998). Twelve individually identifiable protoglomeruli emerge by 72 hpf (Dynes and Ngai, 1998; Li et al., 2005; Lakhina et al., 2012). Two classes of sensory neurons project to mutually exclusive protoglomeruli in each OB (Sato et al., 2005). Ciliated sensory neurons express classical main OB-type ORs along with olfactory marker protein (OMP). They innervate the central zone (CZ), dorsal zone (DZ), lateral protoglomerulus 3 (LG3), and also sparsely innervate the medial protoglomeruli (MG). Microvillous sensory neurons express V2R-type vomeronasal receptors along

Department of Neuroscience, University of Pennsylvania School of Medicine, Philadelphia, PA 19104, USA.

\*Author for correspondence (raperj@mail.med.upenn.edu)

Received 7 July 2015; Accepted 25 November 2015

with the transient receptor potential channel C2 (Trpc2). They innervate lateral protoglomeruli 1, 2 and 4 (LG1, LG2 and LG4), the ventral posterior glomerulus (VPG) and the olfactory plexus (OP) (Celik et al., 2002; Sato et al., 2005; Lakhina et al., 2012). Individual glomeruli are seen to bud off from protoglomeruli starting at ~96 hpf (Li et al., 2005). Zebrafish OSNs are first responsive to odorants between 60 and 96 hpf (Li et al., 2005). A long-term aim of our studies is to relate developmental mechanisms to the functional architecture of the bulb.

Previous work has shown that Netrins expressed near the ventral border and the midline of the OB help to guide a subset of olfactory sensory axons into the bulb and towards the CZ protoglomerulus (Lakhina et al., 2012). This subset of sensory neurons is labeled by expression of a transgene in which the *or111-7* coding sequence and an IRES:GAL4 reporter are embedded in a minigene construct containing the non-coding sequences surrounding *or111-7* along with an enhancer element that is near the *or111* gene cluster (Lakhina et al., 2012). In this study we show that sensory axons labeled by the same transgene are repelled by *Sema3D* expressed at the anterior margin of the OB, pushing them towards the more posteriorly positioned CZ protoglomerulus. We show that the Semaphorin receptor component Neuropilin 1a (Nrp1a) is required for *Sema3D* repulsion of *or111-7* transgene-labeled sensory neurons, and that Nrp2b contributes to their targeting through an independent signaling pathway mediated by an as yet unidentified ligand. Our results identify multiple parallel signaling pathways that cooperate to guide a subset of sensory axons to a particular protoglomerulus.

## RESULTS

### *Sema3d* and *netrin 1b* have complementary expression patterns in the OB

Semaphorins play key roles in the regional targeting of OSNs in both fly and mouse (reviewed by Mori and Sakano, 2011; Lattemann et al., 2007; Joo et al., 2013). *Sema3A* and *Sema3F*, secreted members of the larger semaphorin family of axon guidance molecules, are important determinants of olfactory sensory axon targeting in vertebrate systems (Schwartz et al., 2000; Cloutier et al., 2004; Imai et al., 2009; Takeuchi et al., 2010). The expression of additional class 3 semaphorins has been reported in mouse (*Sema3C* and *Sema3B*) and in chick (*Sema3C*, *Sema3D* and *Sema3E*) during olfactory system development (Giger et al., 2000; Renzi et al., 2000; Cloutier et al., 2002). As a first step towards understanding their contribution to protoglomerular targeting in the zebrafish, we examined the patterns of class 3 semaphorin mRNA expression in the olfactory system at 36 hpf, when sensory axons have reached the OB but are not yet organized into protoglomeruli. There are 12 identified class 3 zebrafish semaphorins: 3Aa, 3Ab, 3B, 3Bl, 3C, 3D, 3E, 3Fa, 3Fb, 3Ga, 3Gb and 3H (Amores, 1998; Halloran et al., 1999; Roos et al., 1999; Yee et al., 1999; Stevens and Halloran, 2005; Yu and Moens, 2005). Although many are expressed in distinct patterns (Table S1) within the bulb, *Sema3d* is expressed in a complementary pattern to *netrin 1b*, an attractant that helps guide sensory neurons expressing an *or111-7* transgene to the CZ protoglomerulus (Lakhina et al., 2012). At 36 hpf, *Sema3d* mRNA is not detected in OSNs but is strongly expressed in the anteriormost region of the primordial OB (Fig. 1). The axons of OSNs expressing the *or111-7* transgene project just posteriorly to *Sema3d*-expressing regions of the bulb. By contrast, *netrin 1b* mRNA expression overlaps *Sema3d* expression in the anterior bulb, but extends further posteriorly where it is coincident with *or111-7* transgene-expressing axons (Fig. 1). Thus, *Sema3d* expression is

temporally and spatially positioned in a way that could direct the early axon pathfinding of *or111-7* transgene-expressing axons, perhaps by working in opposition to *netrin 1b*.

### *or111-7* transgene-expressing axons project ectopically into the DZ protoglomerulus in *Sema3d* mutants

To test whether *Sema3D* is required in the guidance of *or111-7* transgene-expressing sensory axons, we analyzed the olfactory projections in larvae harboring the presumptive null allele *Sema3d<sup>tsa1661</sup>*. This allele was identified by the Sanger Centre Zebrafish Mutation Project and contains a nonsense codon that generates a premature stop at amino acid 257. This stop is within the *Sema* domain (amino acids 74–521; Ensembl genome browser 75, ENSDARG00000017369), which is required for the interaction of class 3 semaphorins with their receptors (Feiner et al., 1997; Koppel et al., 1997); it is in an exon that cannot be skipped without throwing the translated sequence out of frame. *Sema3d* homozygous mutants were obtained at a frequency of ~23% and are viable. Because protoglomeruli are composed exclusively of neuropil, propidium iodide staining allows their visualization as pronounced acellular regions in the OB. There were no gross differences in OB morphology or protoglomerular pattern in *Sema3d* mutants as compared with wild-type larvae at 72 hpf (Fig. 2A,B).

*or111-7* transgene-expressing axons projected to the CZ in wild-type, *Sema3d<sup>+/-</sup>* and *Sema3d<sup>-/-</sup>* larvae (Fig. 2C,D). However, in *Sema3d<sup>-/-</sup>* bulbs, one or more *or111-7* transgene-expressing axons inappropriately targeted the DZ in 37% of bulbs ( $n=53$ ) as compared with 14% in wild-type siblings ( $n=44$ ) and 16% in *Sema3d<sup>+/-</sup>* siblings ( $n=45$ ). Using Fisher's exact test we estimate the chance of axons projecting to the DZ at the same frequency in *Sema3d<sup>-/-</sup>* and wild-type larvae as  $P=0.02$ ; similarly, when comparing *Sema3d<sup>-/-</sup>* with *Sema3d<sup>+/-</sup>* larvae as  $P=0.02$  (Fig. 2). No additional significant misprojections to other protoglomerular targets were observed. Ectopic projections that did not terminate in a protoglomerulus were scored as 'other'. *or111-7* transgenic axons do not display an increase in non-protoglomerular errors in *Sema3d<sup>-/-</sup>* mutants (Fig. S1G).

To determine whether the loss of *Sema3d* has any broader effects on OSN pathfinding, we increased *Sema3d<sup>+/-</sup>*;Omp:RFP or *Sema3d<sup>+/-</sup>*;Trpc2:venus lines. Omp-expressing OSN axons project to the CZ, DZ, LG3, and MG protoglomeruli with the same frequency in *Sema3d<sup>-/-</sup>* as compared with controls and there were no apparent differences in innervation density between mutants and controls (Fig. S1A,B,E). Nor do Omp-expressing sensory axons display any increase in non-protoglomerular targeting errors in *Sema3d<sup>-/-</sup>* mutants (Fig. S1E). Similarly, there were no significant differences in the protoglomerular or non-protoglomerular targeting of Trpc2-expressing sensory axons in *Sema3d<sup>-/-</sup>* as compared with controls (Fig. S1C,D,F). The *or111-7* transgene also labels a small subset of Omp-negative sensory neurons that project to the Trpc2-specific protoglomerulus LG1 (Lakhina et al., 2012). The lack of a *Sema3d<sup>-/-</sup>* phenotype in Trpc2-expressing axons indicates that the errors observed in the *or111-7* transgenic background originate from Omp-positive neurons that normally target the CZ. Furthermore, there was no significant difference in the number of bulbs with projections to LG1 in *Sema3d<sup>-/-</sup>* mutants (Fig. S1G).

Thus, *Sema3D* is required to specifically direct protoglomerular targeting of a subset of Omp-positive axons that project to the CZ. Since the Omp:RFP line does not permit analysis of specific protoglomerular targeting errors, it remains possible that *Sema3D* influences the targeting of other subsets of axons within this class; for example, those that normally target the DZ or LG3 protoglomeruli.

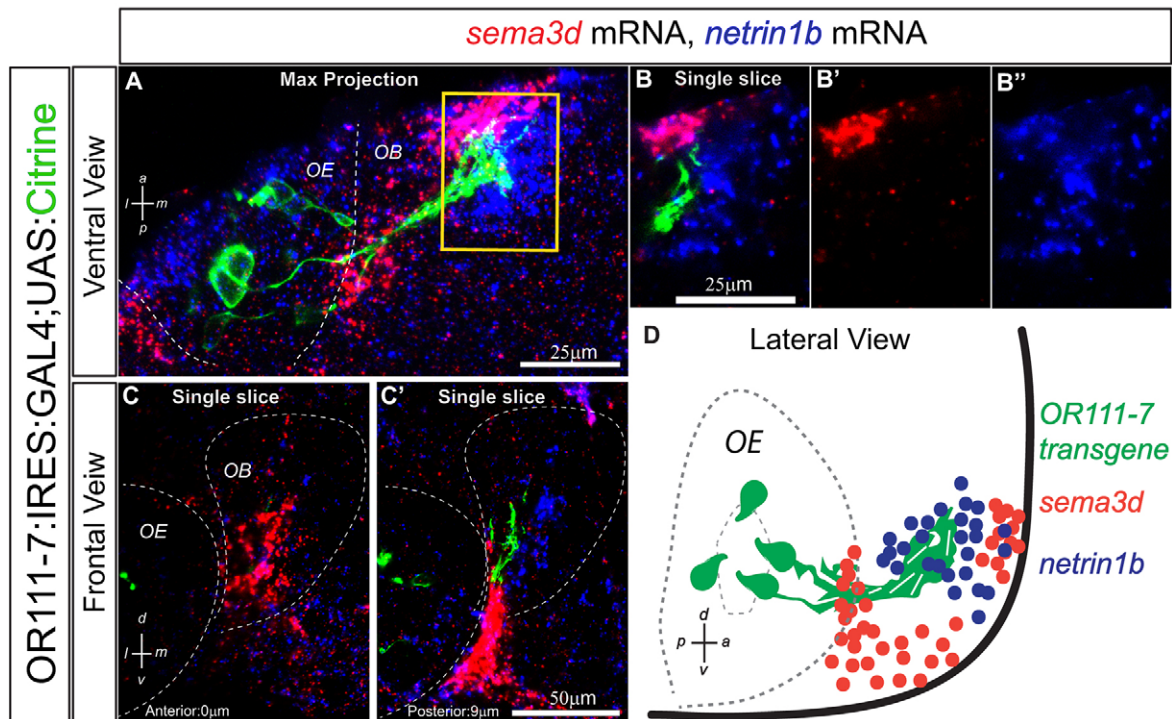

**Fig. 1. *sema3d* and *netrin 1b* have complementary expression patterns in the zebrafish OB at 36 hpf.** (A) Maximum intensity projection spanning 30  $\mu\text{m}$  through a 36 hpf *or111-7:IRES:GAL4;UAS:citrine* embryo. Ventral view, anterior is up and medial is to the right. Axons are shown in green, *sema3d* mRNA in red and *netrin 1b* mRNA in blue. (B-B'') A single optical section through the inset in A. (C, C') Single optical sections through a 36 hpf embryo. Frontal view, dorsal is up and medial is to the right. Sections are arranged from anterior (left) to posterior (right). The distance from each section to the anteriormost part of the telencephalon is denoted in bottom left. (D) Diagram of a 36 hpf embryo in lateral view. *sema3d* is expressed in the anterior OB. Some *netrin 1b* is detected in the anterior bulb but it extends further posteriorly. *or111-7* transgene-expressing axons are positioned posterior to *sema3d* expression but within the *netrin 1b* expression domain. *or111-7* transgenic axons are not present in the anteriormost portion of the telencephalon. *sema3d* expression wraps around the edge of the olfactory pit and is also present between the OE and nascent OB. OE, olfactory epithelium; OB, olfactory bulb.

*sema3d* is strongly expressed in the anterior OB at 36 hpf. Although *Sema3D* protein may perdure longer, mRNA expression decreases markedly by 48 hpf, and is undetectable in the anterior OB by 72 hpf (data not shown). We examined whether errors in axon positioning could be observed at very early time points. We examined the *or111-7* transgene-expressing projection at 36 hpf and 48 hpf. We found no obvious differences at these early stages in axon trajectories between mutants and controls (data not shown). At these time points, we occasionally saw a small subset of *or111-7* transgene-expressing axons that project toward the anterior OB in wild-type larvae (Fig. 1; data not shown). It is possible that, in the absence of *Sema3D*, these projections fail to be redirected posteriorward and persist in abnormal anterior territories through 72 hpf. Protoplomeruli are not detectable before 72 hpf and, without a transgene that labels the DZ projection, it is unclear whether these axons are intermingled with those that will ultimately target the DZ. Our findings support a model whereby the early repellent actions of *Sema3D* in the anterior olfactory OB direct *or111-7* transgene-labeled axons posteriorly away from the nascent DZ (see Fig. 7).

#### All four zebrafish neuropilins are expressed in the developing olfactory system

Class 3 semaphorins signal through neuropilin/plexin A receptor complexes (Sharma et al., 2012). There are two mammalian neuropilins, *Nrp1* and *Nrp2*, which differ in their binding affinities for various class 3 semaphorins (Chen et al., 1997). Although mouse *Sema3D* has been reported to bind *Nrp1* and not *Nrp2* *in vitro*, experiments in zebrafish suggest that *Sema3d* can signal

through *Nrp1a/Nrp2b* complexes (Wolman et al., 2004; Degenhardt et al., 2013).

To identify potential candidate receptors for *Sema3D*, we examined neuropilin expression in the olfactory system at 36 hpf. There are four zebrafish neuropilins: *nrp1a*, *nrp1b*, *nrp2a* and *nrp2b* (Bovenkamp et al., 2004; Yu et al., 2004). *or111-7* transgene-expressing neurons express detectable *nrp1a* (66%), *nrp1b* (54%) and *nrp2b* (46%) (Fig. 3). *nrp2a* was detected in only 17% of *or111-7* transgene-expressing neurons at this stage (Fig. 3C,E). The presence of *nrp1a*, *nrp1b* and *nrp2b* mRNA in a substantial proportion of *or111-7* transgene-expressing neurons makes each a good candidate for mediating the effects of *Sema3D* in *or111-7* transgene-expressing OSNs.

#### Loss of *nrp1a*, *nrp1b* or *nrp2b* induces protoglomerular mistargeting

To further identify candidate receptors for *Sema3D*, we examined *or111-7* transgene-expressing OSN axon targeting in *nrp1a*, *nrp1b* or *nrp2b* presumptive null mutants. The *nrp1a*<sup>sa1485</sup> allele contains a nonsense mutation that results in a premature stop codon at amino acid 206 within the second CUB domain (Ensembl genome browser 75, ENSDARG00000071865). The *nrp1b*<sup>lh278</sup> allele contains a nonsense mutation that results in a premature stop codon at amino acid 116 within the first CUB domain (Ensembl genome browser 75, ENSDARG00000027290). Skipping the exons harboring the nonsense mutations in either mutant would throw the translated sequences out of frame. The *nrp2b*<sup>mn0126GT</sup> allele contains an RFP and a polyadenylation site inserted into the coding sequence at



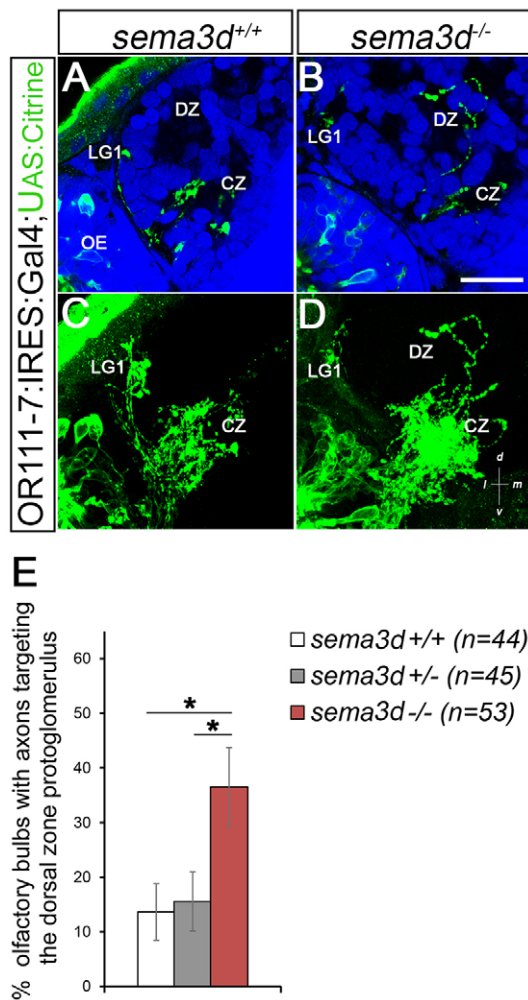

**Fig. 2. *or111-7* transgenic axons misproject to the DZ in *sema3d* mutants.** (A,B) Single optical sections through 72 hpf *or111-7*:IRES:GAL4;UAS:citrine larvae (frontal view). Axons are in green. Dorsal is up and medial is to the right. Propidium iodide (blue) labels cell bodies, revealing protoglomeruli as cell-free regions. (C,D) Maximum intensity projections of serial optical sections from the larvae shown in A,B. (A,C) Wild-type *or111-7* transgenic axons project to the CZ and LG1. (B,D) In *sema3d* mutants, a subset of *or111-7* transgenic axons inappropriately projects to the DZ. Scale bar: 25  $\mu$ m. (E) The percentage of OBs that have a labeled projection to the DZ protoglomerulus. *sema3d* homozygous mutants are compared with heterozygous and wild-type siblings. Statistical significance was estimated using two-tailed Fisher's exact test ( $P < 0.05^*$ ). Error bars represent s.e. of the sample proportion. CZ, central zone; DZ, dorsal zone; LG1, lateral protoglomerulus 1; OE, olfactory epithelium.

amino acid 427 just before the second Coagulation factor homology domain (Clark et al., 2011).

OB morphology and protoglomerular positioning appear normal in all three mutants at 72 hpf (Fig. 4). Similar to *sema3d*<sup>-/-</sup> mutants, *or111-7* transgene-expressing axons misproject to the DZ in *nrp1a*<sup>-/-</sup> mutants. Mistargeting to the DZ was observed in 28% ( $n=47$ ) of *nrp1a*<sup>-/-</sup> bulbs as compared with 8% in wild-type siblings ( $n=50$ ,  $P=0.02$ ) and 6% in heterozygote siblings ( $n=54$ ,  $P=0.003$ ) (Fig. 4B,E). In contrast to *sema3d*<sup>-/-</sup> mutants, *or111-7* transgene-expressing axons also misproject to non-protoglomerular locations in *nrp1a*<sup>-/-</sup> mutants (Fig. 4E). Axons misproject to regions of the bulb that are dorsal to the CZ in 51% of mutants as compared with 24% of heterozygous siblings ( $P=0.007$ ). Additionally, we found that *or111-7* transgene-expressing axons inappropriately targeted the DZ in 48% ( $n=42$ ) of *nrp2b*<sup>-/-</sup> bulbs as

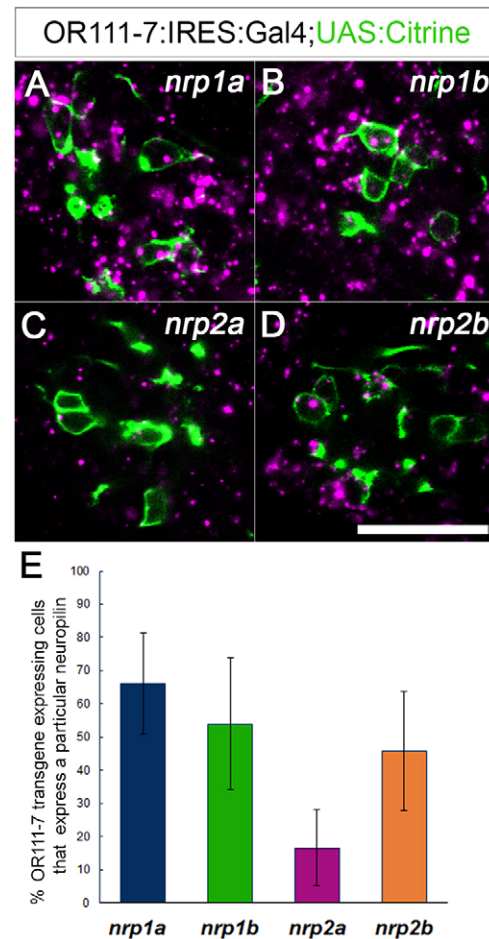

**Fig. 3. Four zebrafish neuropilins are expressed in *or111-7* transgene-labeled neurons during development.** (A-D) Single optical sections through the OE of 36 hpf embryos (frontal view). mRNA is in magenta. Subsets of *or111-7* transgene-labeled neurons (green) express (A) *nrp1a* ( $N=56$  pits/764 cells), (B) *nrp1b* ( $N=16$  pits/191 cells), (C) *nrp2a* ( $N=29$  pits/610 cells) and (D) *nrp2b* ( $N=26$  pits/384 cells). Scale bar: 25  $\mu$ m. (E) The percentage of *or111-7* transgene-expressing cells expressing a given neuropilin at 36 hpf. Error bars represent s.d.

compared with only 7% ( $n=30$ ,  $P=0.0002$ ) in wild-type siblings and 14% ( $n=42$ ,  $P=0.002$ ) in heterozygous sibling larvae (Fig. 4D,G). No non-protoglomerular targeting errors were detected in *nrp2b*<sup>-/-</sup> larvae (Fig. 4G). *or111-7* transgene-expressing axons do not have a significant increase in projections to the DZ in *nrp1b*<sup>-/-</sup> mutants (Fig. 4C,F). They do, however, have increased projections to LG2 (Fig. 4C,F). These data indicate that Nrp1a or Nrp2b could serve as a *Sema3D* receptor component in *or111-7* transgene-expressing OSNs.

### ***sema3d* interacts with *nrp1a* to promote targeting of *or111-7* transgene-expressing axons to the CZ**

We next tested whether *nrp1a* or *nrp2b* genetically interact with *sema3d*. If either of these neuropilins acts as a receptor component for *Sema3D*, larvae that are heterozygous for both *nrp1a* or *nrp2b* and *sema3d* might have a sufficient reduction in signaling activity to induce ectopic misprojections to the DZ, similar to those observed in *sema3d*<sup>-/-</sup> mutants. Larvae carrying heterozygous mutations for either *sema3d*, *nrp1a* or *nrp2b* alone had no detectable DZ targeting errors (Fig. 5A,B,D,E,G). *or111-7* transgene-expressing axons terminated inappropriately in the DZ in 29% of *sema3d*<sup>+/-</sup>; *nrp1a*<sup>+/-</sup> transheterozygotes ( $n=68$ ,  $P=0.003$ ) as compared with 10% in

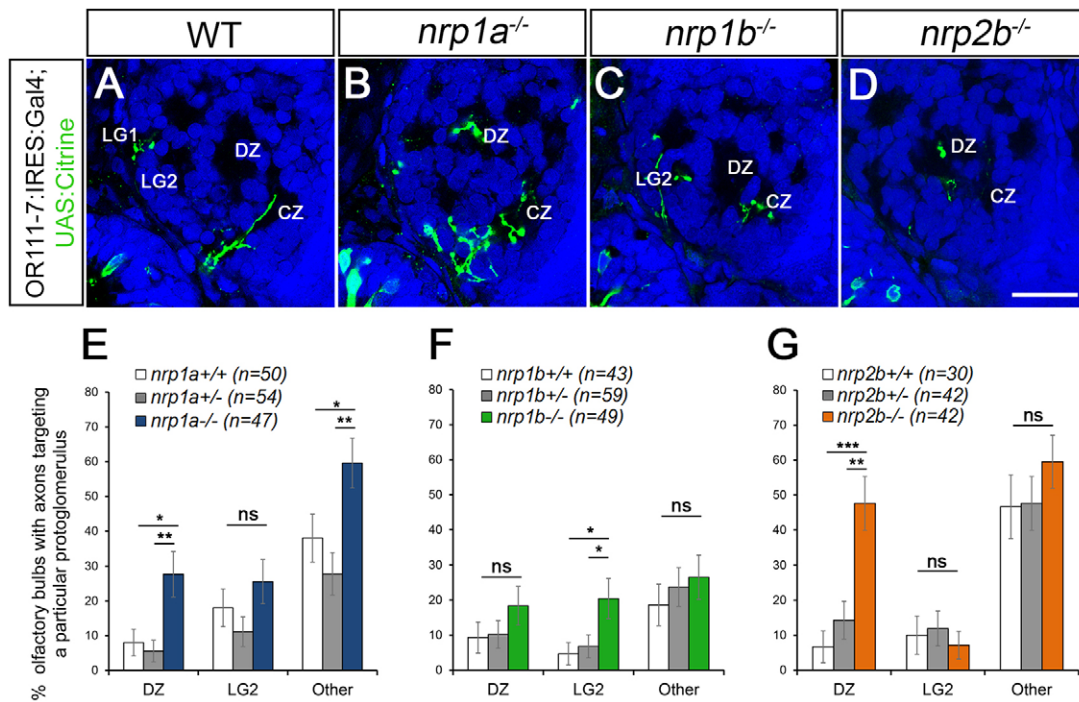

**Fig. 4. Loss of *nrp1a* phenocopies *sema3d* mutants.** (A-D) Single optical sections through 72 hpf *or111-7* transgenic larvae (frontal view). Axons are in green. Dorsal is up and medial is to the right. Propidium iodide (blue) labels cell bodies revealing protoglomeruli as cell-free regions. WT, wild type. Scale bar: 25  $\mu$ m. (E-G) Percentage of OBs displaying a projection to a particular protoglomerulus or all non-protoglomerular regions (other) is shown. Statistical significance was estimated using two-tailed Fisher's exact tests ( $P < 0.05^*$ ,  $P < 0.01^{**}$ ,  $P < 0.001^{***}$ ; ns, not significant). Homozygous mutants are compared with wild-type and heterozygous siblings. Error bars represent s.e. of the sample proportion. (B,E) A subset of *or111-7* transgene-labeled axons misproject to the DZ and to non-protoglomerular areas in *nrp1a* mutants. (C,F) *nrp1b* mutants do not have increased mistargeting errors to the DZ but do have increased misprojections to LG2. (D,G) A subset of *or111-7* transgene-labeled axons also inappropriately targets the DZ in *nrp2b* mutants. CZ, central zone; DZ, dorsal zone; LG1, lateral protoglomerulus 1; LG2, lateral protoglomerulus 2.

*sema3d*<sup>+/-</sup> or 8% in *nrp1a*<sup>+/-</sup> siblings (Fig. 5C,F,G). Similarly, we tested for interactions between *sema3d* and *nrp2b*. In contrast to the *sema3d*<sup>+/-</sup>;*nrp1a*<sup>+/-</sup> transheterozygotes, no excess DZ misprojections were observed in *sema3d*<sup>+/-</sup>;*nrp2b*<sup>+/-</sup> fish (Fig. 5G). Thus, a genetic interaction is detected between *sema3d* and *nrp1a* but not between *sema3d* and *nrp2b*.

We next examined double-mutant larvae to further probe the relative contributions of Nrp1a or Nrp2b to Sema3D signaling. *or111-7* transgene-expressing sensory axons mistargeted the DZ in 29% of *sema3d*<sup>-/-</sup> mutants, in 31% of *nrp1a*<sup>-/-</sup> siblings, and in 28% of *sema3d*<sup>-/-</sup>;*nrp1a*<sup>-/-</sup> double-mutant siblings. Thus, the frequency of misprojections is not augmented in double mutants. This is consistent with *sema3d* and *nrp1a* working in the same signaling pathway, assuming that both mutants are null, a reasonable assumption given the nature of these mutations. By contrast, *or111-7* transgene-expressing axons mistargeted to the DZ in 29% of *sema3d*<sup>-/-</sup> mutants, in 43% of *nrp2b*<sup>-/-</sup> siblings, and in 64% of *sema3d*<sup>-/-</sup>;*nrp2b*<sup>-/-</sup> siblings. *nrp2b* mutants thus have a higher frequency of DZ misprojections than *sema3d* mutants, and errors increase further in *sema3d*<sup>-/-</sup>;*nrp2b*<sup>-/-</sup> double mutants (Fig. 5G). This finding is consistent with Sema3D and Nrp2b participating in parallel signaling pathways. Together, these data indicate that Nrp1a is acting as the primary receptor for Sema3D in this context, and that Nrp2b is likely to be mediating the activity of another ligand or ligands.

We examined *nrp1a* or *nrp2b* mutants in the *Trpc2:venus* background and did not observe an increase in projections to the DZ (data not shown). This indicates that, as with *sema3d*<sup>-/-</sup> mutants, the *or111-7* transgene-labeled axons that misproject to the DZ in

*nrp1a*<sup>-/-</sup> and *nrp2b*<sup>-/-</sup> mutants are likely to be Omp-positive neurons that normally project to the CZ. They are unlikely to be recruited from *or111-7* transgene-labeled (and *Trpc2*-expressing) axons that sometimes terminate in LG1. To further verify that Nrp1a-expressing axons that respond to Sema3D are a subset of Omp-positive neurons rather than *Trpc2*-positive neurons, we examined *sema3d*<sup>+/-</sup>;*nrp1a*<sup>+/-</sup> transheterozygotes in which both Omp and *or111-7* transgene-expressing neurons are labeled. As expected, axons mistargeting to the DZ in *sema3d*<sup>+/-</sup>;*nrp1a*<sup>+/-</sup> transheterozygotes are Omp positive (Fig. S1H).

#### Selective expression of *nrp1a* in *or111-7* transgene-expressing OSNs corrects targeting errors in *nrp1a* mutants

These results support a model in which Nrp1a serves as an essential receptor component for Sema3D in *or111-7* transgene-expressing sensory axons, and that in normal circumstances its presence helps prevent their entry into the DZ protoglomerulus. To test whether *nrp1a* is required cell-autonomously for normal *or111-7* transgene-expressing axon guidance, we generated an *nrp1a*<sup>+/-</sup>;UAS:*nrp1a*;UAS:citrine transgenic line. Three different *nrp1a*<sup>+/-</sup>;UAS:*nrp1a*;UAS:citrine founders were mated to *nrp1a*<sup>+/-</sup>;*or111-7*:GAL4 fish. No protoglomerular mistargeting was detected in *or111-7* transgene-expressing axons when Nrp1a was overexpressed in otherwise wild-type larvae (Fig. 5G). *nrp1a* mutants expressing the UAS:*nrp1a* transgene do not project ectopically to the DZ (Fig. 5G). The ability of Nrp1a expressed in *or111-7* transgene-expressing neurons to correct targeting errors seen in *nrp1a* mutants is consistent with its acting cell-autonomously to guide these axons to their correct target.

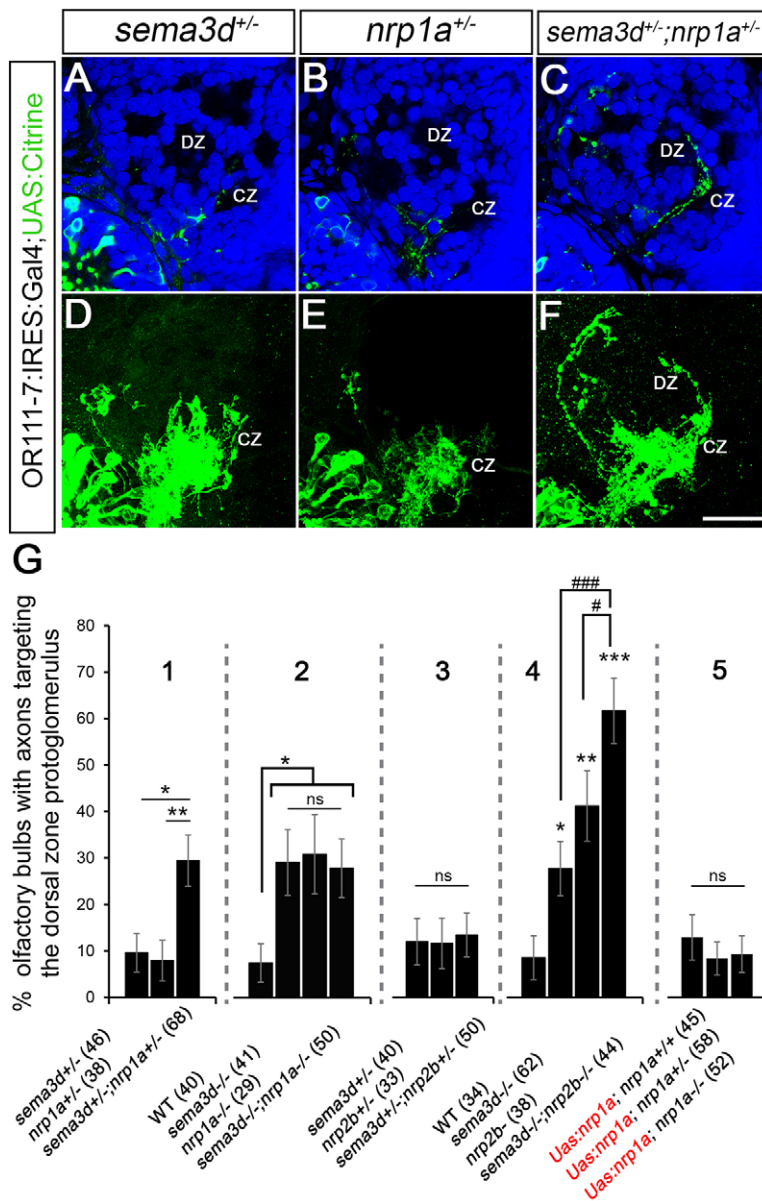

**Fig. 5. *sema3d* interacts genetically with *nrp1a* to promote axon targeting of *or111-7* transgene-labeled axons to the CZ.** (A-C) Single optical sections through 72 hpf *or111-7* transgenic larvae (frontal view). Axons are in green. Dorsal is up and medial is to the right. Propidium iodide (blue) labels cell bodies revealing protoglomeruli as cell-free regions. (D-F) Maximum intensity projections of serial optical sections from the larvae shown in A-C. Scale bar: 25  $\mu$ m. (G) The percentage of OBs with projections to the DZ protoglomerulus. Statistical significance was estimated using two-tailed ( $P < 0.05^*$ ,  $P < 0.01^{**}$ ,  $P < 0.001^{***}$ ) or one-tailed ( $^{\#}P < 0.05$ ,  $^{###}P < 0.001$ ) Fisher's exact tests. Error bars represent s.e. of the sample proportion. *sema3d<sup>+/-</sup>;nrp1a<sup>+/-</sup>* transheterozygotic larvae (C,F; 1 in G) have an increase in projections to the DZ compared with *sema3d<sup>+/-</sup>* heterozygotic (A,D) or *nrp1a<sup>+/-</sup>* heterozygotic (B,E) siblings. *sema3d<sup>-/-</sup>* mutants, *nrp1a<sup>-/-</sup>* mutants and *sema3d<sup>-/-</sup>;nrp1a<sup>-/-</sup>* double mutants have a similar increase in projections to the DZ as compared with wild-type siblings (2 in G). By contrast, *sema3d<sup>+/-</sup>;nrp2b<sup>+/-</sup>* transheterozygotes do not have an increase in projections to the DZ when compared with *sema3d<sup>+/-</sup>* heterozygotic or *nrp2b<sup>+/-</sup>* heterozygotic siblings (3 in G). *sema3d<sup>-/-</sup>;nrp2b<sup>-/-</sup>* double mutants have a greater frequency of projections to the DZ than *sema3d<sup>-/-</sup>* or *nrp2b<sup>-/-</sup>* siblings (4 in G). *nrp1a<sup>-/-</sup>* mutants expressing the *Uas:nrp1a:UAS:citrine* transgene do not have an increase in misprojections to the DZ or non-protoglomerular regions as compared with wild-type or heterozygotic siblings (5 in G). CZ, central zone; DZ, dorsal zone.

### ***nrp1a* and *dcc* are transiently co-expressed in a subset of *or111-7* transgene-expressing neurons**

Previous work showed that *or111-7* transgene-expressing sensory neurons express the netrin receptor Dcc, and that Netrin 1b acts as an attractant that draws this subgroup of axons to the CZ protoglomerulus (Lakhina et al., 2012). We hypothesized that *Sema3D/Nrp1a* and *Netrin 1b/Dcc* signaling cooperate to target axons to the CZ. If this were the case, we would predict that *nrp1a* and *dcc* should be co-expressed in the majority of *or111-7* transgene-expressing neurons and that loss of both receptors might result in increased DZ mistargeting as compared with loss of either receptor alone.

We first asked what proportion of *or111-7*-expressing axons express *nrp1a* and/or *dcc* during early axon targeting. *or111-7* transgene expression is first observed at 27 hpf (Lakhina et al., 2012). At this time point we detected  $\sim 10 \pm 6$  sensory neurons per olfactory pit that express the *or111-7* transgene. *nrp1a* was detected in 73% and *dcc* was detected in 60% of *or111-7* transgene-expressing neurons at 27 hpf (Fig. 6B). At this stage of development, co-expression of *nrp1a* and *dcc* was observed in

54% of *or111-7* transgene-expressing neurons (Fig. 6B). Only 5% of *or111-7* transgene-expressing sensory neurons appeared to express *dcc* alone, while 19% appeared to express *nrp1a* alone (Fig. 6B). In cells expressing *dcc*, 91% also express *nrp1a* at 27 hpf. There is a decline in the total number and the proportion of colabeled cells from 36 hpf to 48 hpf, whereas the proportion of cells expressing *nrp1a* or *dcc* alone remained fairly constant (Fig. 6B). We examined *nrp1a<sup>-/-</sup>;dcc<sup>-/-</sup>* double mutants, expecting to see an increased frequency of DZ misprojections as compared with either mutant alone. *or111-7* transgene-expressing axons terminated inappropriately in the DZ in  $\sim 24\%$  of *nrp1a<sup>-/-</sup>* or *dcc<sup>-/-</sup>* single mutants as compared with 40% in *nrp1a<sup>-/-</sup>;dcc<sup>-/-</sup>* siblings (Fig. 6C-F). We did not observe a genetic interaction between *nrp1a* and *dcc* in transheterozygote larvae (data not shown). As DZ misprojections are significantly greater in the double mutant as compared with either single mutant, this result is consistent with *Netrin 1b/Dcc* and *Sema3D/Nrp1a* signaling pathways working in parallel to guide *or111-7* transgene-expressing cells to the CZ protoglomerulus. The observation that most axons within this subgroup of sensory neurons reach the CZ protoglomerulus even in



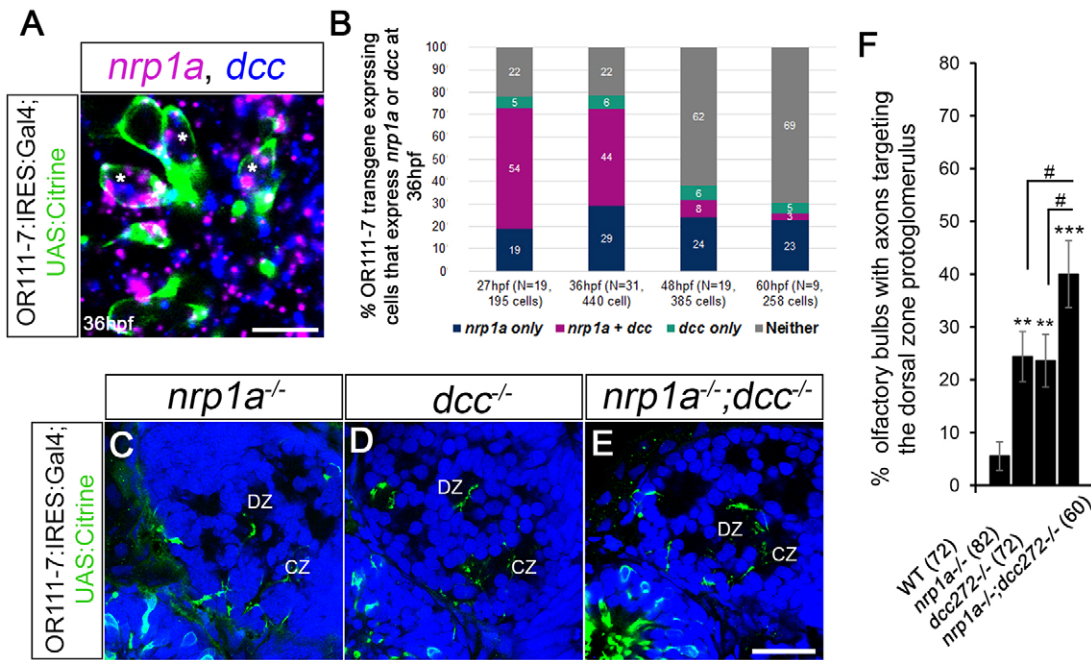

**Fig. 6. Relative contributions of *Nrp1a* and *Dcc* to DZ mistargeting.** (A) A single optical section through a 36 hpf *or111-7* transgenic embryo (frontal view). Cell bodies are in green. Dorsal is up and medial is to the right. *nrp1a* mRNA is in magenta and *dcc* mRNA is in blue. (B) The percentages of *or111-7*-labeled neurons expressing *nrp1a*, *dcc* or both at 27, 36, 48 or 60 hpf. (A,B) *nrp1a* and *dcc* are co-expressed in a large portion of *or111-7*-labeled neurons during early development (asterisks in A). (C-E) Single optical sections through 72 hpf *or111-7* transgenic larvae (frontal view). Axons are in green. Dorsal is up and medial is to the right. Propidium iodide (blue) labels cell bodies revealing protoglomeruli as cell-free regions. (F) The percentage of OBs with projections to the DZ protoglomerulus. (C-F) *nrp1a*<sup>-/-</sup> mutants, *dcc*<sup>-/-</sup> mutants and *nrp1a*<sup>-/-</sup>;*dcc*<sup>-/-</sup> double mutants have an increase in projections to the DZ as compared with wild-type siblings. *nrp1a*<sup>-/-</sup>;*dcc*<sup>-/-</sup> double mutants have a statistically significant increase in DZ errors when compared with single-mutant siblings. Statistical significance was estimated using two-tailed (\*\**P*<0.01, \*\*\**P*<0.001) or one-tailed (#*P*<0.05) Fisher's exact tests. Error bars represent s.e. of the sample proportion. CZ, central zone; DZ, dorsal zone. Scale bars: 10 μm in A; 25 μm in C-E.

*nrp1a*<sup>-/-</sup>;*dcc*<sup>-/-</sup> double mutants indicates that additional guidance pathways cooperate to ensure CZ targeting.

## DISCUSSION

This study identifies *Sema3D* as a guidance cue that is required for a subset of olfactory sensory axons to target a well-defined intermediate protoglomerular target. *or111-7* transgene-expressing axons normally extend just posteriorly to *sema3d*-expressing cells at the anteriormost margin of the OB. In wild-type larvae these axons congregate in the CZ protoglomerulus, but in *sema3d* mutants they frequently misproject into the more anterior and dorsal DZ protoglomerulus. These observations can be most simply explained by *Sema3D* acting as a repellent for *or111-7* transgene-expressing axons, directing them posteriorly towards the CZ. We identified the semaphorin receptor component *Nrp1a* as a likely signaling partner for *Sema3D*. There are four neuropilins in zebrafish: *nrp1a*, *nrp1b*, *nrp2a* and *nrp2b* (Bovenkamp et al., 2004; Yu et al., 2004). A large proportion of *or111-7* transgene-labeled neurons express *nrp1a*, *nrp1b* and *nrp2b* (Fig. 3). Loss of either *nrp1a* or *nrp2b* induces misprojections to the DZ protoglomerulus, making both possible candidate receptors for *Sema3D*. A genetic interaction can be demonstrated between *nrp1a* and *sema3d* in double-heterozygous larvae, but not between *sema3d* and *nrp2b* (Fig. 5). The degree of DZ misprojections in *sema3d*<sup>-/-</sup>;*nrp1a*<sup>-/-</sup> double mutants is similar to that of *nrp1a* or *sema3d* single mutants in both penetrance and severity, whereas DZ targeting errors are significantly more prevalent in *sema3d*<sup>-/-</sup>;*nrp2b*<sup>-/-</sup> double mutants as compared with either single mutant (Fig. 5). Our results support the conclusion that *Nrp1a* is the key

neuropilin mediating *Sema3D* repulsion in *or111-7* transgene-expressing neurons. Additionally, our results strongly suggest that an unidentified ligand – perhaps another one of the many class 3 semaphorins expressed in the zebrafish olfactory system (Table S1) – acts through *Nrp2b* to promote accurate targeting of *or111-7* transgene-expressing axons to the CZ.

*Nrp1*-mediated signaling has been proposed to affect OSN axon targeting along the anterior-posterior (AP) axis in the main OB of the mouse (Schwartz et al., 2000, 2004; Taniguchi et al., 2003; Imai et al., 2009). *Sema3a* is thought to be its activating ligand and is expressed in anteromedial and ventral regions of the olfactory nerve layer (Schwartz et al., 2000); it is also expressed in a subset of OSNs (Imai et al., 2009). Selected glomeruli formed by *Nrp1*-expressing axons are shifted anteriorly in the OBs of *Nrp1*, *Sema3a*, or OSN-specific *Sema3a* mouse mutants (Taniguchi et al., 2003; Imai et al., 2009). Conversely, overexpression of *Nrp1* in a subset of OSNs shifts the position of their glomerulus posteriorly (Imai et al., 2009). Our results show that *Nrp1a* signaling also affects OSN targeting along the AP axis in the zebrafish OB but, at least in the context of our studies, this effect is largely *Sema3D* dependent. This suggests that *Sema3D* plays a role in fish reminiscent of the role that *Sema3A* is proposed to play in mice. We also observed a *Sema3D*-independent increase in non-protoglomerular dorsally directed errors in *nrp1a* mutants (Fig. 4), implying that *Nrp1a* is likely to act as a receptor for additional ligands. Zebrafish *sema3aa* and *sema3ab* are expressed in overlapping regions in dorsal and lateral regions of the OB at 36 hpf (Table S1; data not shown). Based on these expression patterns, *sema3aa* and *sema3ab* might be candidate guidance cues affecting dorsal-ventral targeting in zebrafish.

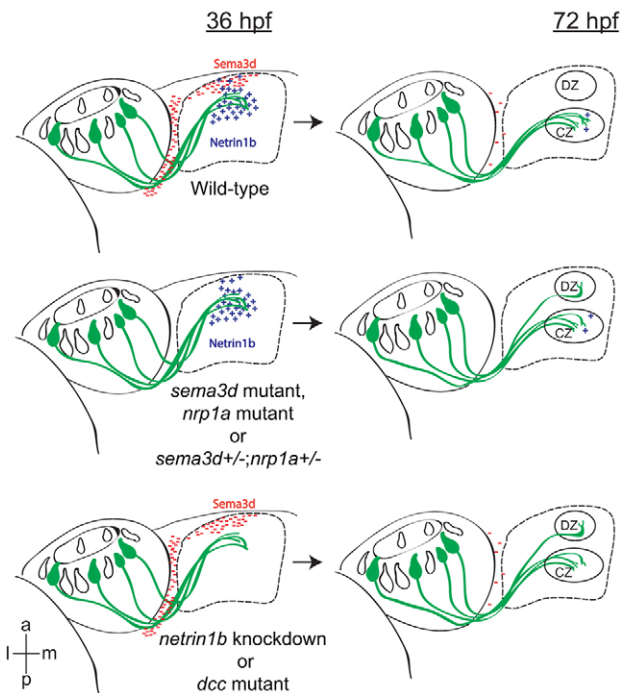

**Fig. 7. Semaphorin/Neuropilin-mediated repulsion and Netrin/Dcc-mediated attraction guide *or111-7* transgene-expressing axons to their initial target in the OB, the CZ.** *or111-7* transgene-expressing neurons (green) project to the CZ protoglomerulus. Early in development (36 hpf), *sema3d* is expressed in the anterior OB and in the boundary between the olfactory pit and OB (red). *netrin1b* (blue) is expressed more posteriorly in the OB. *or111-7* transgene-expressing axons invade *netrin1b*-expressing but not *sema3d*-expressing areas of the bulb. Loss of either *Sema3D*-mediated repulsion or *Netrin*-mediated attraction induces a subset of *or111-7* transgene-expressing axons to target the more dorsally and anteriorly located DZ protoglomerulus at 72 hpf. Ventral views, anterior is up and medial is to the left. CZ, central zone; DZ, dorsal zone.

The guidance events that we are studying occur early in development, before the emergence of OR-specific glomeruli. During this period, OSNs target a relatively small number (12) of discrete protoglomerular neuropils. A very early requirement for the expression of the guidance receptors that establish the protoglomerular map seems to be emerging. In zebrafish, expression of all of the guidance receptors thus far implicated in early OSN guidance, namely *robo2*, *dcc*, and now *nrp1a* and *nrp2b*, are all downregulated between 27 hpf and 48 hpf (Miyasaka et al., 2005; Lakhina et al., 2012) (Fig. 6F; data not shown). It has been suggested that immature mouse OSNs express a distinct set of axon guidance genes compared with mature neurons (McIntyre et al., 2010). It is possible that accurate targeting relies upon the early expression of guidance receptors that either pre-sort axons in the olfactory nerve or direct them as they first enter the bulb (Imai et al., 2009; Miller et al., 2010). A different set of receptors might regulate the segregation of OR-specific glomeruli in more mature OSNs.

In this study we show for the first time that *sema3d* is required for normal OSN targeting in the bulb. Our results support a model in which *Sema3D/Nrp1a*-mediated repulsion directs a specific subset of sensory axons towards a well-defined intermediate target, the CZ protoglomerulus. This same subset of sensory axons was previously shown to be drawn towards the same intermediate target by *Netrin1b* acting through the *Dcc* receptor (Fig. 7) (Lakhina et al., 2012). Our *dcc* and *nrp1a* double-mutant data support a model in which

*Sema3D/Nrp1a* and *Netrin1b/Dcc* signal independently and in parallel through competing attractive and repellent mechanisms to direct a subset of axons to the same target. Additionally, *Nrp1b*, and especially *Nrp2b*, participate in the normal guidance of this subset of sensory axons though *Sema3D*-independent signaling pathways. These findings suggest that the first targeting events within the bulb are more complex than previously appreciated, with many different ligand-receptor pairs cooperating to guide sensory axons to particular protoglomeruli. Each cue that we have identified contributes to normal pathfinding, but none is decisive on its own. This should not be surprising. For example, no single mutant was found to be fully penetrant in a collection of mutants affecting axon and neuroblast migration in *C. elegans* (Hedgecock et al., 1985, 1990). The development of complex neural circuitry originates through an evolutionary process that is likely to add additional guidance cues and receptors on top of those already in use, thereby either increasing the robustness of targeting or altering connectivity. The resulting complexity of cooperating and competing guidance pathways is likely to be a common feature of how neural circuits are assembled.

## MATERIALS AND METHODS

### Zebrafish maintenance and transgenic lines

Adult zebrafish were raised and maintained according to standard procedures (Mullins, 1994). All experiments were conducted with the approval of the University of Pennsylvania Institutional Animal Care and Use Committee (IACUC). Veterinary care was supervised by University Laboratory Animal Resources (ULAR). Larvae were staged based on hours post fertilization (hpf) and were raised at 28°C. For some experiments, the 36 hpf time point was obtained by incubating for 1 day at 28°C and 1 day at 25°C (Kimmel et al., 1995). Before fixation, larvae were staged based on morphology (Westerfield, 1995). *Tg(omp:lyn-RFP)* and *Tg(trpc2:gap-VENUS)* lines were gifts from the Yoshihara laboratory at the RIKEN Brain Science Institute, Saitama, Japan (Sato et al., 2005). The *Tg(or111-7:or111-7-IRES:GAL4)*, *Tg(omp:GAL4)* and *Tg(UAS:gap43-citrine)* lines were described by Lakhina et al. (2012). A double-transgenic line, *Tg(or111-7:GAL4;UAS:citrine)*, was generated by crossing *Tg(or111-7:or111-7-IRES:GAL4)* to *Tg(UAS:gap43-citrine)*. A *UAS:nrp1a* rescue line was generated by injecting a *tol2 UAS:nrp1a;UAS:citrine* construct (Dell et al., 2013) into embryos produced from an *nrp1a<sup>sa1485+/-</sup>* incross using standard procedures (Fisher et al., 2006). These fish were raised to adulthood, screened for germline transmission of the transgene, and genotyped. *nrp1a<sup>sa1485+/-</sup>*; *UAS:nrp1a;UAS:citrine* founders were mated with the *nrp1a<sup>sa1485+/-</sup>*; *or111-7:or111-7-IRES:GAL4* line and the resultant larvae were analyzed. Transgenic lines were used alone or crossed into various mutant strains.

### Zebrafish mutants

*sema3d<sup>sa1661</sup>* and *nrp1a<sup>sa1485</sup>* mutants were generated by the Sanger Centre Zebrafish Mutation Project and obtained from The Zebrafish International Resource Center (ZIRC). These were genotyped using KASPR assays (LGC Genomics; *sema3d* SNP ID 554-1608.1, *nrp1a* SNP ID 554-1410.1). The *nrp1b<sup>fh278</sup>* mutant was identified by the Zebrafish Tilling Project and ordered from ZIRC. The *nrp2b<sup>mn0126GT</sup>* mutants were a gift from the Ekker laboratory at the Mayo Clinic, Rochester, MN, USA and are available from ZIRC (Clark et al., 2011). Standard PCR-based methods were used to genotype *nrp1b<sup>fh278</sup>* (forward primer, 5'-TCTCTCTGGGAGGTTCTGC-3'; reverse primer, 5'-TGTCTTTGTGTGTGTGCATT-3'; *MseI* cuts the mutant sequence into 161 bp and 34 bp fragments) and *nrp2b<sup>mn0126GT</sup>* (*nrp2b* forward primer, 5'-GCTGAAGATCCGGTATCAGACGAAAAAC-A-3'; *nrp2b* reverse primer, 5'-AGACCTGCCATATTGGTGAGTACCG-A-3'; *RFP* reverse primer, 5'-CCTTGAAGCGCATGAACCTTGTAT-3') lines. The *dcc<sup>lm272b</sup>* allele has been described (Lakhina et al., 2012; Jain et al., 2014). Unless otherwise noted, experiments were conducted by mating heterozygous parents. Their fluorescent progeny were collected at 72 hpf and genomic DNA was extracted from tails for genotyping. Matched



heads were processed for immunohistochemistry and imaged using confocal microscopy.

### Whole-mount immunohistochemistry

Immunohistochemistry was performed as previously described (Lakhina et al., 2012). Larvae were fixed in 4% paraformaldehyde in PBS and dehydrated in methanol. To visualize Citrine-positive axons, larvae were permeabilized in acetone for 20 min at  $-20^{\circ}\text{C}$  and stained with goat anti-GFP (1:300; Rockland Immunochemicals, 600-101-215) and donkey anti-goat IgG Alexa Fluor 488 (1:500; Invitrogen) or donkey anti-goat IgG Alexa Fluor 647 (1:500; Invitrogen). To visualize RFP-positive axons, fish were permeabilized for 30 min in 0.1% collagenase at room temperature and stained with rabbit anti-dsRed (1:300; Clontech, 632496) and donkey anti-rabbit IgG Alexa Fluor 647 (1:500; Invitrogen). Propidium iodide staining was performed following secondary antibody treatment as described by Brend and Holley (2009), with the exception that larvae were not treated with RNase. Confocal microscopy was performed on an inverted Leica SP5 using a  $40\times$  oil-immersion lens. Stacks were acquired through the entire OB with optical sections taken  $1\ \mu\text{m}$  apart.

### Whole-mount fluorescent *in situ* hybridization

Single-label *in situ* hybridization was performed using antisense digoxigenin (DIG) RNA probes as previously described (Chalasanani, 2007). *In situ* signals were amplified using a cyanine 3-coupled tyramide kit (TSA Plus Cyanine 3; PerkinElmer, NEL744001KT). Double-label *in situ* hybridization was performed using DIG and fluorescein-labeled probes as previously described (Brend and Holley, 2009), with the exception that embryos were not dehydrated in between detection of the first and second probes and RNase (RNase A,  $10\ \mu\text{g}/\text{ml}$ ; RNase T1,  $100\ \text{U}/\text{ml}$ ; Roche, 10109193001) treatment was included after probe removal. The DIG label was amplified using the cyanine 3-coupled tyramide kit and the fluorescein label was amplified using a fluorescein-coupled tyramide kit (PerkinElmer, NEL741001KT). Prior to tyramide amplification, embryos were incubated in either anti-DIG-POD (1:500; Roche, 11207733910) or anti-fluorescein-POD (1:500; Roche, 11426346910). Immunohistochemistry, propidium iodide labeling and imaging were performed following tyramide amplification as described above.

The plasmids used to make probes targeting *sema3d*, *sema3e* and *nrp1a* were as described by Dell et al. (2013). The plasmids used to make probes for *sema3aa*, *sema3ab*, *sema3fa*, *sema3fb*, *sema3ga*, *sema3gb* and *nrp2b* were gifts from the Moens laboratory at the Fred Hutchinson Cancer Research Center, Seattle, WA, USA (Yu et al., 2004; Yu and Moens, 2005). The plasmid used to make the *sema3h* probe was a gift from the Halloran laboratory at the University of Wisconsin, Madison, WI, USA (Stevens and Halloran, 2005). For *sema3c* (refseq accession number XM\_687755.5, nucleotides 1539-2400), *nrp1b* (refseq accession number NM\_205674.1, nucleotides 2-972) and *nrp2a* (refseq accession number NM\_212965.1, nucleotides 138-1108) sequences were amplified from cDNA and cloned into pCRII (Invitrogen, K460001) for probe synthesis. Full-length probes were used in all hybridization experiments. The plasmids used to make probes targeting *dcc* and *netrin 1b* were as described by Lakhina et al. (2012).

### Quantification of targeting errors

The number of OBs containing axons terminating in either individual protoglomeruli or non-protoglomerular regions were counted. The percentage of OBs with axons in particular locations was recorded and Fisher's exact test (two-tailed) was used to determine statistical significance. To determine whether the number of errors was statistically greater in double mutants as compared with single mutants, a one-tailed Fisher's exact test was used (Figs 5 and 6). Error bars represent s.e. of the sample proportion. Axons were scored as projecting to a particular protoglomerulus only if they terminated in that protoglomerulus and not if they passed through it en route to another location.

### Acknowledgements

We thank Xiaohe (Diana) Sun for assistance with genotyping.

### Competing interests

The authors declare no competing or financial interests.

### Author contributions

A.A.T. and J.A.R. developed concepts and prepared the manuscript. A.A.T., C.L.M., W.Y. and G.J.K. performed experiments and analyzed data.

### Funding

This work was supported by a grant from the National Institutes of Health [1R01DC012854]. Deposited in PMC for release after 12 months.

### Supplementary information

Supplementary information available online at <http://dev.biologists.org/lookup/suppl/doi:10.1242/dev.127985/-/DC1>

### References

- Alioto, T. S. and Ngai, J. (2005). The odorant receptor repertoire of teleost fish. *BMC Genomics* **6**, 173.
- Amores, A. (1998). Zebrafish hox clusters and vertebrate genome evolution. *Science* **282**, 1711-1714.
- Bovenkamp, D. E., Goishi, K., Bahary, N., Davidson, A. J., Zhou, Y., Becker, T., Becker, C. G., Zon, L. I. and Klagsbrun, M. (2004). Expression and mapping of duplicate neuropilin-1 and neuropilin-2 genes in developing zebrafish. *Gene Expr. Patterns* **4**, 361-370.
- Bozza, T., Feinstein, P., Zheng, C. and Mombaerts, P. (2002). Odorant receptor expression defines functional units in the mouse olfactory system. *J. Neurosci.* **22**, 3033-3043.
- Brend, T. and Holley, S. A. (2009). Zebrafish whole mount high-resolution double fluorescent *in situ* hybridization. *J. Vis. Exp.* **25**. doi:10.3791/1229.
- Celik, A., Fuss, S. and Korsching, S. I. (2002). Selective targeting of zebrafish olfactory receptor neurons by the endogenous OMP promoter. *Eur. J. Neurosci.* **15**, 798-806.
- Chalasanani, S. H., Sabol, A., Xu, H., Gyda, M. A., Rasband, K., Granato, M., Chien, C.-B. and Raper, J. A. (2007). Stromal cell-derived factor-1 antagonizes slit/robo signaling *in vivo*. *J. Neurosci.* **27**, 973-980.
- Chen, H., Chédotal, A., He, Z., Goodman, C. S. and Tessier-Lavigne, M. (1997). Neuropilin-2, a novel member of the neuropilin family, is a high affinity receptor for the semaphorins Sema E and Sema IV but not Sema III. *Cell* **19**, 547-559.
- Cho, J. H., Lépine, M., Andrews, W., Parnavelas, J. and Cloutier, J.-F. (2007). Requirement for Slit-1 and Robo-2 in zonal segregation of olfactory sensory neuron axons in the main olfactory bulb. *J. Neurosci.* **27**, 9094-9104.
- Clark, K. J., Balcianus, D., Pogoda, H.-M., Ding, Y., Westcot, S. E., Bedell, V. M., Greenwood, T. M., Urban, M. D., Skuster, K. J., Petzold, A. M. et al. (2011). *In vivo* protein trapping produces a functional expression codex of the vertebrate proteome. *Nat. Methods* **8**, 506-512.
- Cloutier, J.-F., Giger, R. J., Koentges, G., Dulac, C., Kolodkin, A. L. and Ginty, D. D. (2002). Neuropilin-2 mediates axonal fasciculation, zonal segregation, but not axonal convergence. *Neuron* **33**, 877-892.
- Cloutier, J.-F., Sahay, A., Chang, E. C., Tessier-lavigne, M., Dulac, C., Kolodkin, A. L. and Ginty, D. D. (2004). Differential requirements for Semaphorin 3F and Slit-1 in axonal targeting, fasciculation, and segregation of olfactory sensory neuron projections. *J. Neurosci.* **24**, 9087-9096.
- Col, J. A. D., Matsuo, T., Storm, D. R. and Rodriguez, I. (2007). Adenylyl cyclase-dependent axonal targeting in the olfactory system. *Development* **134**, 2481-2489.
- Conzelmann, S., Malun, D., Breer, H. and Strotmann, J. (2001). Brain targeting and glomerulus formation of two olfactory neuron populations expressing related receptor types. *Eur. J. Neurosci.* **14**, 1623-1632.
- Cutforth, T., Moring, L., Mendelsohn, M., Nemes, A., Shah, N. M., Kim, M. M., Frisén, J. and Axel, R. (2003). Axonal ephrin-As and odorant receptors: coordinate determination of the olfactory sensory map. *Cell* **114**, 311-322.
- Degenhardt, K., Singh, M. K., Aghajanian, H., Massera, D., Wang, Q., Li, J., Li, L., Choi, C., Yzaguirre, A. D., Francey, L. J. et al. (2013). Semaphorin 3d signaling defects are associated with anomalous pulmonary venous connections. *Nat. Med.* **19**, 760-765.
- Dell, A. L., Fried-Cassorla, E., Xu, H. and Raper, J. A. (2013). cAMP-induced expression of Neuropilin1 promotes retinal axon crossing in the zebrafish optic chiasm. *J. Neurosci.* **33**, 11076-11088.
- Doucette, R. (1989). Development of the nerve fiber layer in the olfactory bulb of mouse embryos. *J. Comp. Neurol.* **285**, 514-527.
- Dynes, J. L. and Ngai, J. (1998). Pathfinding of olfactory neuron axons to stereotyped glomerular targets revealed by dynamic imaging in living zebrafish embryos. *Neuron* **20**, 1081-1091.
- Feiner, L., Koppel, A. M., Kobayashi, H. and Raper, J. A. (1997). Secreted chick semaphorins bind recombinant neuropilin with similar affinities but bind different subsets of neurons *in situ*. *Neuron* **19**, 539-545.
- Fisher, S., Grice, E. A., Vinton, R. M., Bessling, S. L., Urasaki, A., Kawakami, K. and McCallion, A. S. (2006). Evaluating the biological relevance of putative enhancers using Tol2 transposon-mediated transgenesis in zebrafish. *Nat. Protoc.* **1**, 1297-1305.

- Giger, R. J., Cloutier, J.-F., Sahay, A., Prinjha, R. K., Levengood, D. V., Moore, S. E., Pickering, S., Simmons, D., Rastan, S., Walsh, F. S. et al. (2000). Neuropilin-2 is required in vivo for selective axon guidance responses to secreted semaphorins. *Neuron* **25**, 29-41.
- Halloran, M. C., Severance, S. M., Yee, C. S., Gemza, D. L., Raper, J. A. and Kuwada, J. Y. (1999). Analysis of a zebrafish semaphorin reveals potential functions in vivo. *Dev. Dyn.* **214**, 13-25.
- Hansen, A. and Zeiske, E. (1993). Development of the olfactory organ in the zebrafish, *Brachydanio rerio*. *J. Comp. Neurol.* **333**, 289-300.
- Hedgecock, E. M., Culotti, J. G., Thomson, J. N. and Perkins, L. A. (1985). Axonal guidance mutants of *Caenorhabditis elegans* identified by filling sensory neurons with fluorescent dyes. *Dev. Biol.* **111**, 158-170.
- Hedgecock, E. M., Culotti, J. G. and Hall, D. H. (1990). The unc-5, unc-6, and unc-40 genes guide circumferential migrations of pioneer axons and mesodermal cells on the epidermis in *C. elegans*. *Neuron* **4**, 61-85.
- Imai, T., Suzuki, M. and Sakano, H. (2006). Odorant receptor-derived cAMP signals direct axonal targeting. *Science* **314**, 657-661.
- Imai, T., Yamazaki, T., Kobayakawa, R., Kobayakawa, K., Abe, T., Suzuki, M. and Sakano, H. (2009). Pre-target axon sorting establishes the neural map topography. *Science* **325**, 585-590.
- Jain, R. A., Bell, H., Lim, A., Chien, C.-B. and Granato, M. (2014). Mirror movement-like defects in startle behavior of zebrafish dcc mutants are caused by aberrant midline guidance of identified descending hindbrain neurons. *J. Neurosci.* **34**, 2898-2909.
- Joo, W. J., Sweeney, L. B., Liang, L. and Luo, L. (2013). Linking cell fate, trajectory choice, and target selection: genetic analysis of Sema-2b in olfactory axon targeting. *Neuron* **78**, 673-686.
- Kaneko-Goto, T., Yoshihara, S.-i., Miyazaki, H. and Yoshihara, Y. (2008). BIG-2 mediates olfactory axon convergence to target glomeruli. *Neuron* **57**, 834-846.
- Kimmel, C. B., Ballard, W. W., Kimmel, S. R., Ullmann, B. and Schilling, T. F. (1995). Stages of embryonic development of the zebrafish. *Dev. Dyn.* **203**, 253-310.
- Koppel, A. M., Feiner, L., Kobayashi, H. and Raper, J. A. (1997). A 70 amino acid region within the semaphorin domain activates specific cellular response of semaphorin family members. *Neuron* **19**, 531-537.
- Lakhina, V., Marcaccio, C. L., Shao, X., Lush, M. E., Jain, R. A., Fujimoto, E., Bonkowsky, J. L., Granato, M. and Raper, J. A. (2012). Netrin/DCC signaling guides olfactory sensory axons to their correct location in the olfactory bulb. *J. Neurosci.* **32**, 4440-4456.
- Lattemann, M., Zierau, A., Schulte, C., Seidl, S., Kuhlmann, B. and Hummel, T. (2007). Semaphorin-1a controls receptor neuron-specific axonal convergence in the primary olfactory center of *Drosophila*. *Neuron* **53**, 169-184.
- Li, J., Mack, J. A., Souren, M., Yaksi, E., Higashijima, S.-i., Mione, M., Fetcho, J. R. and Friedrich, R. W. (2005). Early development of functional spatial maps in the zebrafish olfactory bulb. *J. Neurosci.* **25**, 5784-5795.
- McIntyre, J. C., Titlow, W. B. and McClintock, T. S. (2010). Axon growth and guidance genes identify nascent, immature, and mature olfactory sensory neurons. *J. Neurosci. Res.* **88**, 3243-3256.
- Miller, A. M., Maurer, L. R., Zou, D.-J., Firestein, S. and Greer, C. A. (2010). Axon fasciculation in the developing olfactory nerve. *Neural Dev.* **5**, 20.
- Miyasaka, N., Sato, Y., Yeo, S.-Y., Hutson, L. D., Chien, C.-B., Okamoto, H. and Yoshihara, Y. (2005). Robo2 is required for establishment of a precise glomerular map in the zebrafish olfactory system. *Development* **132**, 1283-1293.
- Miyasaka, N., Arganda-Carreras, I., Wakisaka, N., Masuda, M., Sümbül, U., Seung, H. S. and Yoshihara, Y. (2014). Olfactory projectome in the zebrafish forebrain revealed by genetic single-neuron labelling. *Nat. Commun.* **5**, 3639.
- Mombaerts, P., Wang, F., Dulac, C., Chao, S. K., Nemes, A., Mendelsohn, M., Edmondson, J. and Axel, R. (1996). Visualizing an olfactory sensory map. *Cell* **87**, 675-686.
- Mori, K. and Sakano, H. (2011). How is the olfactory map formed and interpreted in the mammalian brain? *Annu. Rev. Neurosci.* **34**, 467-499.
- Mullins, M. C., Hammerschmidt, M., Haffter, P., and Nüsslein-Volhard, C. (1994). Large-scale mutagenesis in the zebrafish: in search of genes controlling development in a vertebrate. *Curr. Biol.* **4**, 189-202.
- Nguyen-Ba-Charvet, K. T., Di Meglio, T., Fouquet, C. and Chédotal, A. (2008). Robos and slits control the pathfinding and targeting of mouse olfactory sensory axons. *J. Neurosci.* **28**, 4244-4249.
- Potter, S. M., Zheng, C., Koos, D. S., Feinstein, P., Fraser, S. E. and Mombaerts, P. (2001). Structure and emergence of specific olfactory glomeruli in the mouse. *J. Neurosci.* **21**, 9713-9723.
- Ramon y Cajal, S. (1892). Nuevo concepto de la histología de los centros nerviosos: Conferencias. Barcelona.
- Renzi, M. J., Wexler, T. L. and Raper, J. A. (2000). Olfactory sensory axons expressing a dominant-negative Semaphorin receptor enter the CNS early and overshoot their target. *Neuron* **28**, 437-447.
- Ressler, K. J., Sullivan, S. L. and Buck, L. B. (1994). Information coding in the olfactory system: evidence for a stereotyped and highly organized epitope map in the olfactory bulb. *Cell* **79**, 1245-1255.
- Roos, M., Schachner, M. and Bernhardt, R. R. (1999). Zebrafish semaphorin Z1b inhibits growing motor axons in vivo. *Mech. Dev.* **87**, 103-117.
- Royal, S. J. and Key, B. (1999). Development of P2 olfactory glomeruli in P2-internal ribosome entry site-tau-LacZ transgenic mice. *J. Neurosci.* **19**, 9856-9864.
- Sato, Y., Miyasaka, N. and Yoshihara, Y. (2005). Mutually exclusive glomerular innervation by two distinct types of olfactory sensory neurons revealed in transgenic zebrafish. *J. Neurosci.* **25**, 4889-4897.
- Schwartz, G. A., Kostek, C., Ahmad, N., Dibble, C., Pays, L. and Püschel, A. (2000). Semaphorin 3A is required for guidance of olfactory axons in mice. *J. Neurosci.* **20**, 7691-7697.
- Schwartz, G. A., Raitcheva, D., Crandall, J. E., Burkhardt, C. and Püschel, A. W. (2004). Semaphorin 3A-mediated axon guidance regulates convergence and targeting of P2 odorant receptor axons. *Eur. J. Neurosci.* **19**, 1800-1810.
- Serizawa, S., Miyamichi, K., Takeuchi, H., Yamagishi, Y., Suzuki, M. and Sakano, H. (2006). A neuronal identity code for the odorant receptor-specific and activity-dependent axon sorting. *Cell* **127**, 1057-1069.
- Sharma, A., Verhaagen, J. and Harvey, A. R. (2012). Receptor complexes for each of the Class 3 Semaphorins. *Front. Cell Neurosci.* **6**, 28.
- Sosulski, D. L., Lissitsyna Bloom, M., Cutforth, T., Axel, R. and Datta, S. R. (2011). Distinct representations of olfactory information in different cortical centres. *Nature* **472**, 213-216.
- Stevens, C. B. and Halloran, M. C. (2005). Developmental expression of sema3G, a novel zebrafish semaphorin. *Gene Expr. Patterns* **5**, 647-653.
- Takeuchi, H., Inokuchi, K., Aoki, M., Suto, F., Tsuboi, A., Matsuda, I., Suzuki, M., Aiba, A., Serizawa, S., Yoshihara, Y. et al. (2010). Sequential arrival and graded secretion of Sema3F by olfactory neuron axons specify map topography at the bulb. *Cell* **141**, 1056-1067.
- Taniguchi, M., Nagao, H., Takahashi, Y. K., Yamaguchi, M., Mitsui, S., Yagi, T., Mori, K. and Shimizu, T. (2003). Distorted odor maps in the olfactory bulb of semaphorin 3A-deficient mice. *J. Neurosci.* **23**, 1390-1397.
- Treloar, H. B., Purcell, A. L. and Greer, C. A. (1999). Glomerular formation in the developing rat olfactory bulb. *J. Comp. Neurol.* **413**, 289-304.
- Vassalli, A., Rothman, A., Feinstein, P., Zapotocky, M. and Mombaerts, P. (2002). Minigenes impart odorant receptor-specific axon guidance in the olfactory bulb. *Neuron* **35**, 681-696.
- Vassar, R., Chao, S. K., Sitcheran, R., Nuñez, M., Vosshall, L. B. and Axel, R. (1994). Topographic organization of sensory projections to the olfactory bulb. *Cell* **79**, 981-991.
- Wang, F., Nemes, A., Mendelsohn, M. and Axel, R. (1998). Odorant receptors govern the formation of a precise topographic map. *Cell* **93**, 47-60.
- Westerfield, M. (1995). *A Guide for the Laboratory Use of Zebrafish (Danio rerio)*, 3rd edn. Eugene: University of Oregon Press.
- Whitlock, K. E. and Westerfield, M. (1998). A transient population of neurons pioneers the olfactory pathway in the zebrafish. *J. Neurosci.* **18**, 8919-8927.
- Wilson, S. W., Ross, L. S., Parrett, T. and Easter, S. S. (1990). The development of a simple scaffold of axon tracts in the brain of the embryonic zebrafish, *Brachydanio rerio*. *Development* **108**, 121-145.
- Wolman, M. A., Liu, Y., Tawarayama, H., Shoji, W. and Halloran, M. C. (2004). Repulsion and attraction of axons by semaphorin3D are mediated by different neuropilins in vivo. *J. Neurosci.* **24**, 8428-8435.
- Yee, C. S., Chandrasekhar, A., Halloran, M. C., Shoji, W., Warren, J. T. and Kuwada, J. Y. (1999). Molecular cloning, expression, and activity of zebrafish semaphorin Z1a. *Brain Res. Bull.* **48**, 581-593.
- Yu, H.-H. and Moens, C. B. (2005). Semaphorin signaling guides cranial neural crest cell migration in zebrafish. *Dev. Biol.* **280**, 373-385.
- Yu, H.-H., Houart, C. and Moens, C. B. (2004). Cloning and embryonic expression of zebrafish neuropilin genes. *Gene Expr. Patterns* **4**, 371-378.
- Zhang, X. and Firestein, S. (2002). The olfactory receptor gene superfamily of the mouse. *Nature* **5**, 124-133.
